# Supplementary material
Source: PubMed Central journal article supplement (PMC2154442)

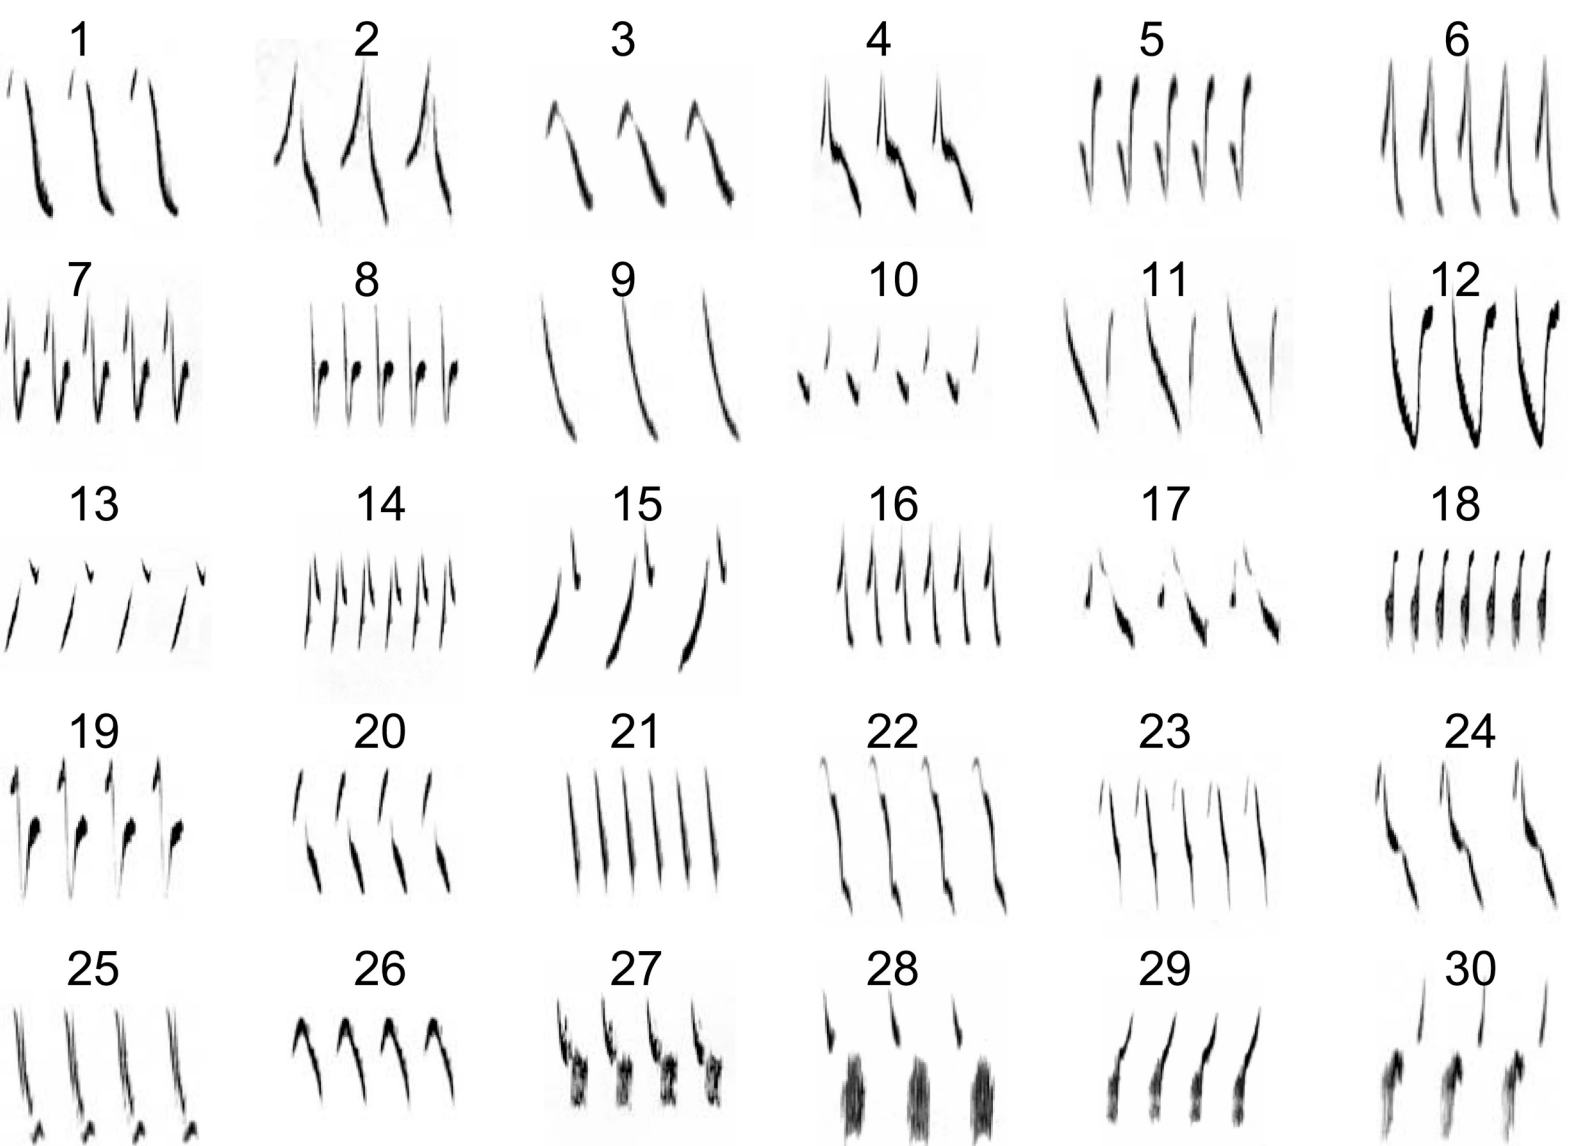

Supplement: supp_0710067104_10067Fig7.pdf [file supp_0710067104_10067Fig7.pdf]

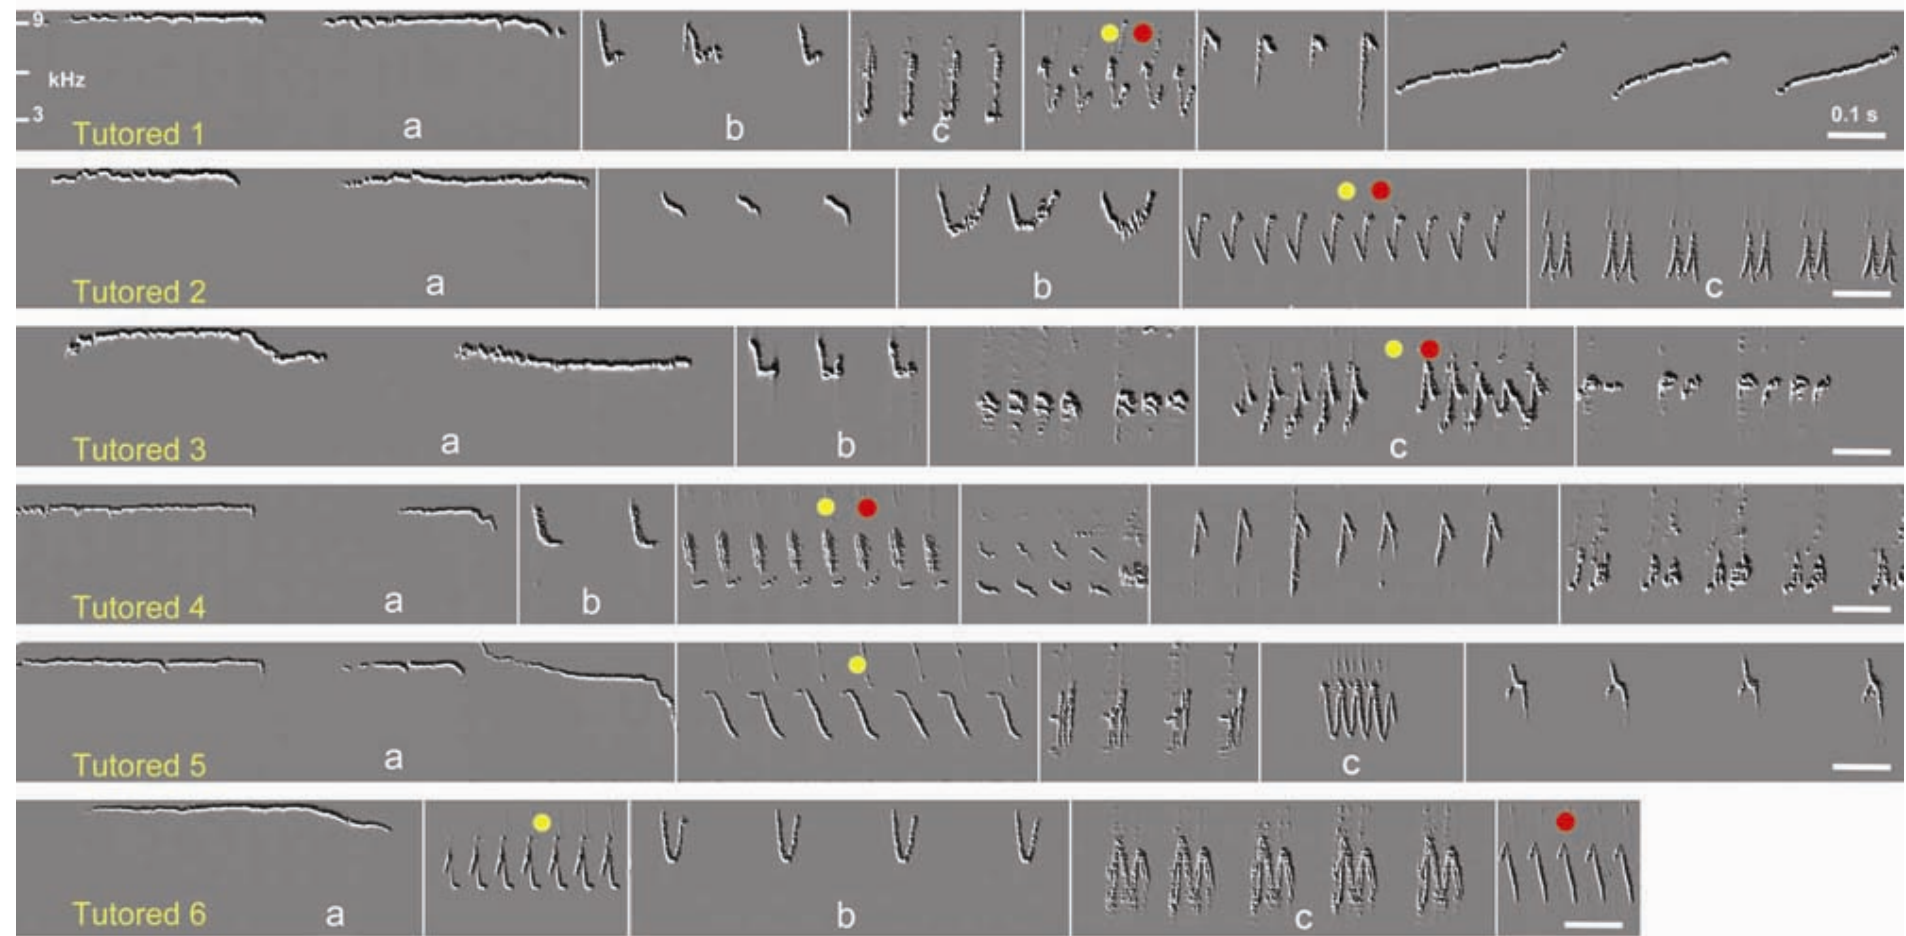

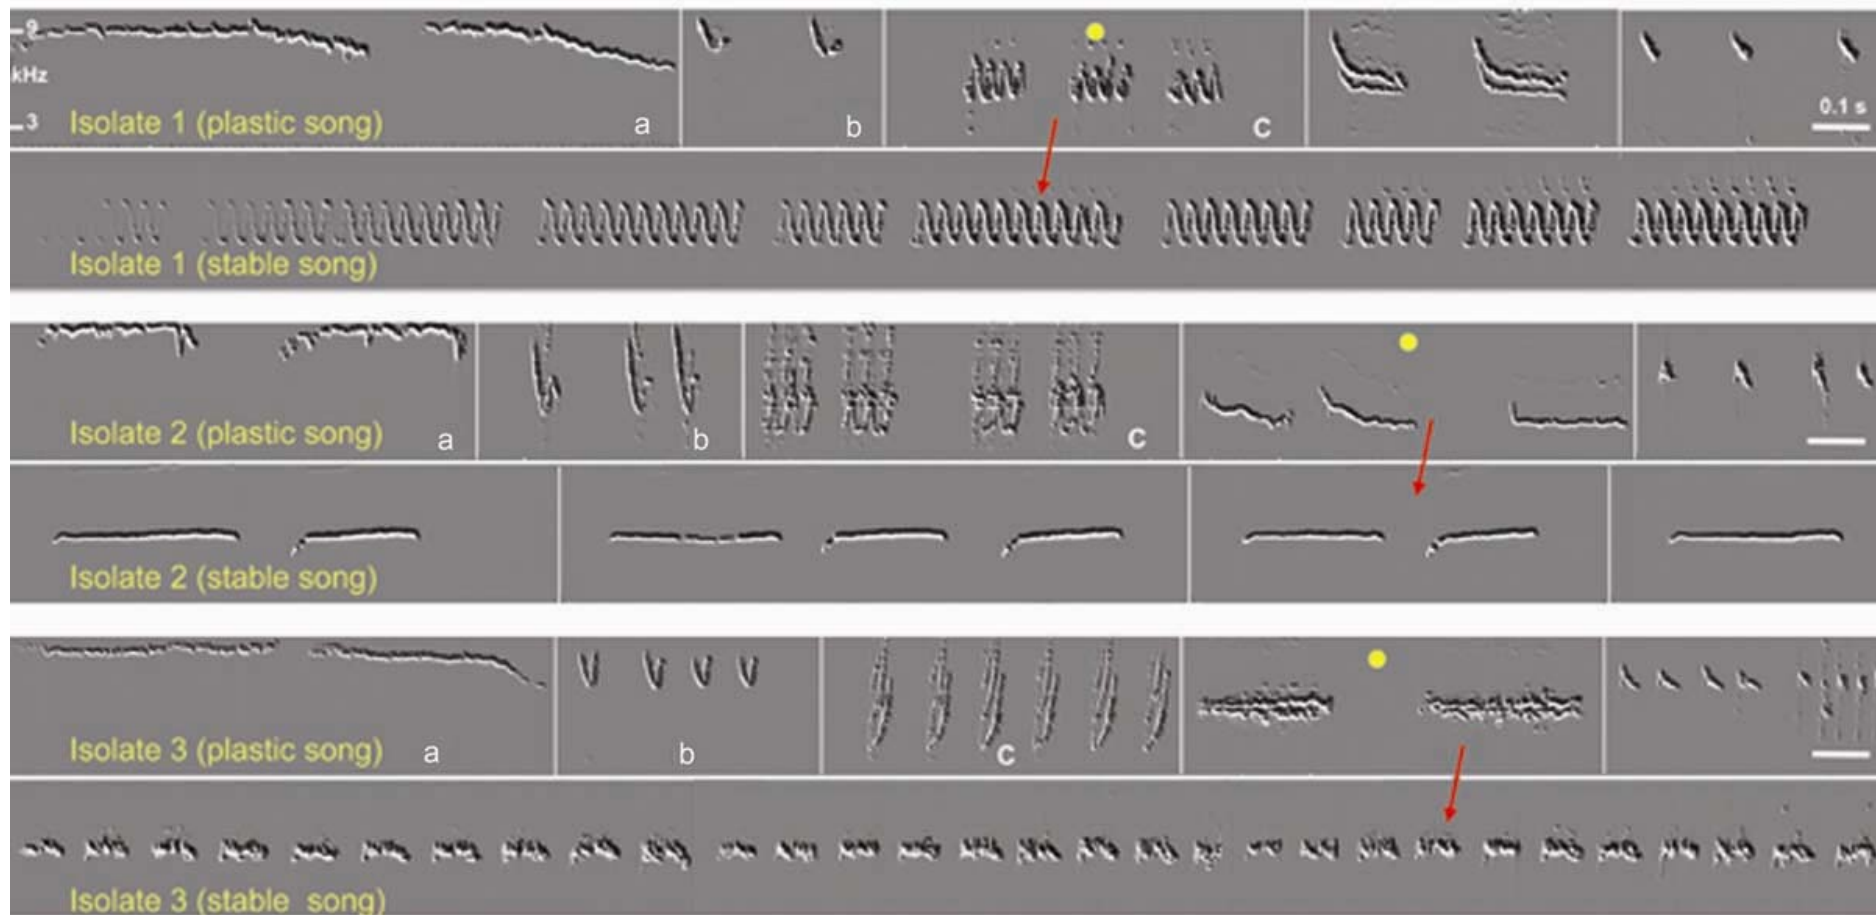

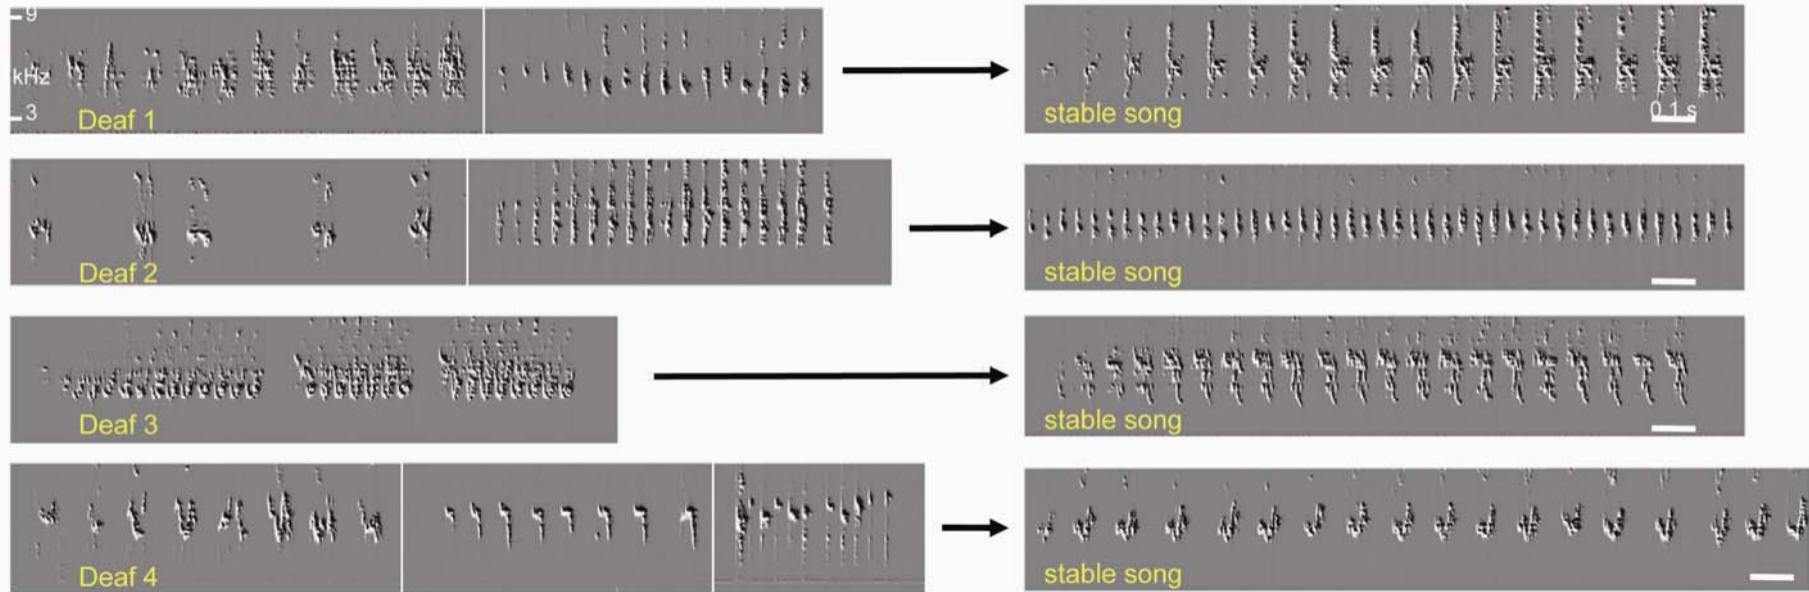

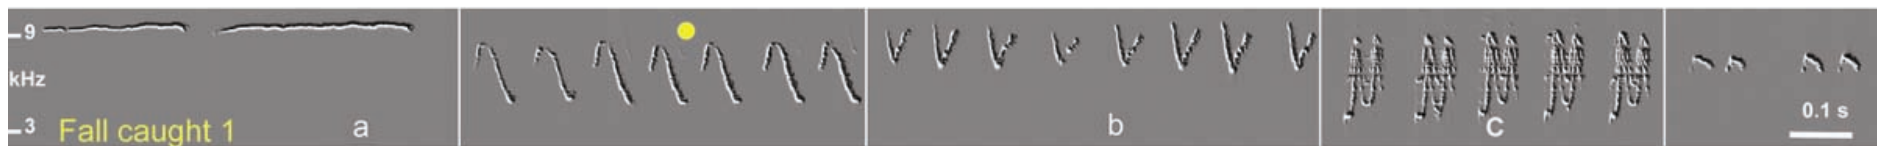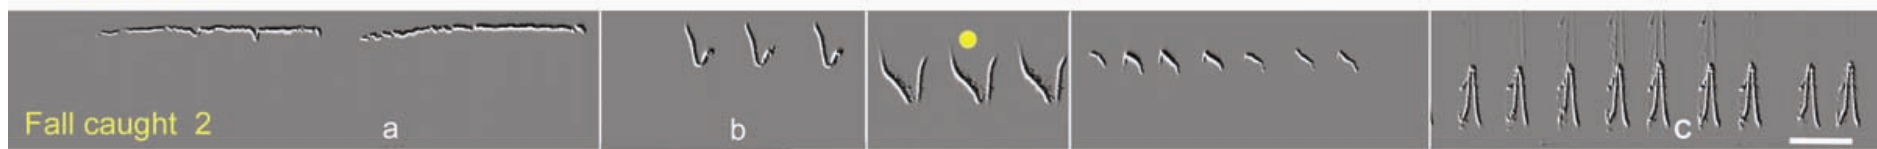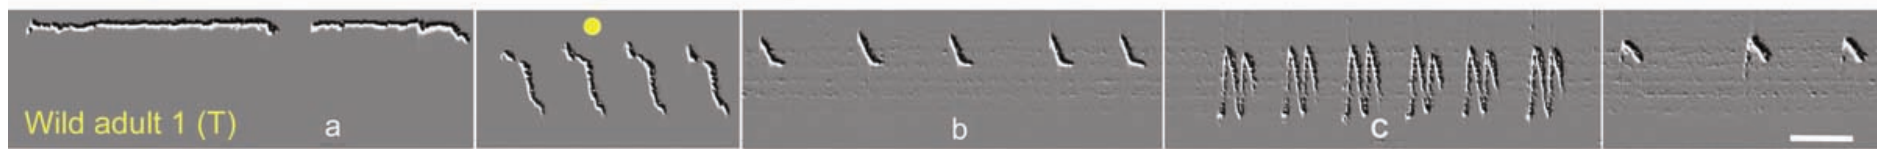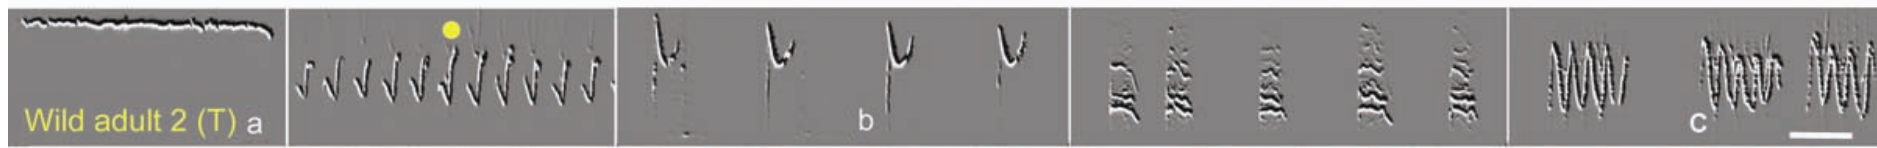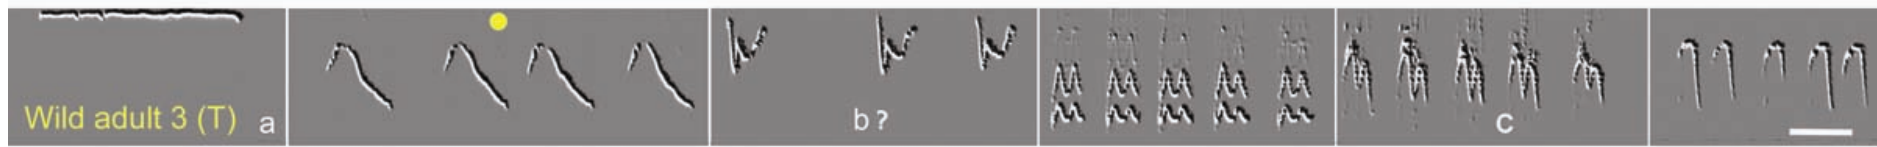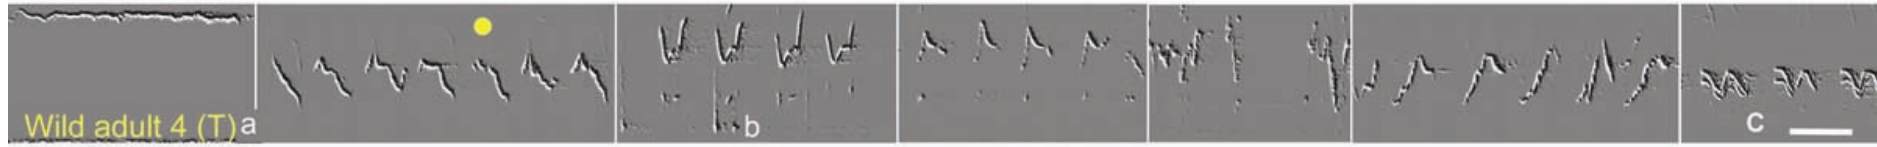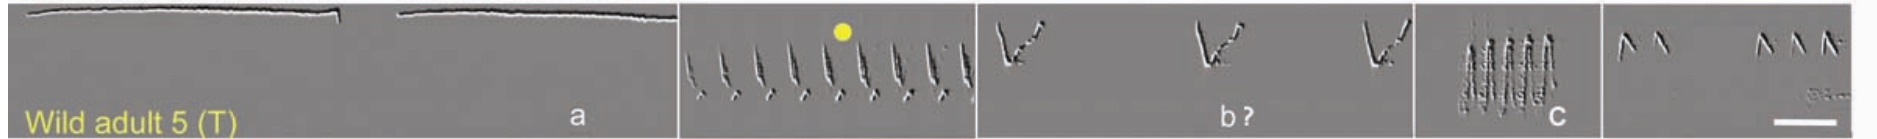

Supplement: supp_0710067104_10067Fig8.pdf [file supp_0710067104_10067Fig8.pdf]

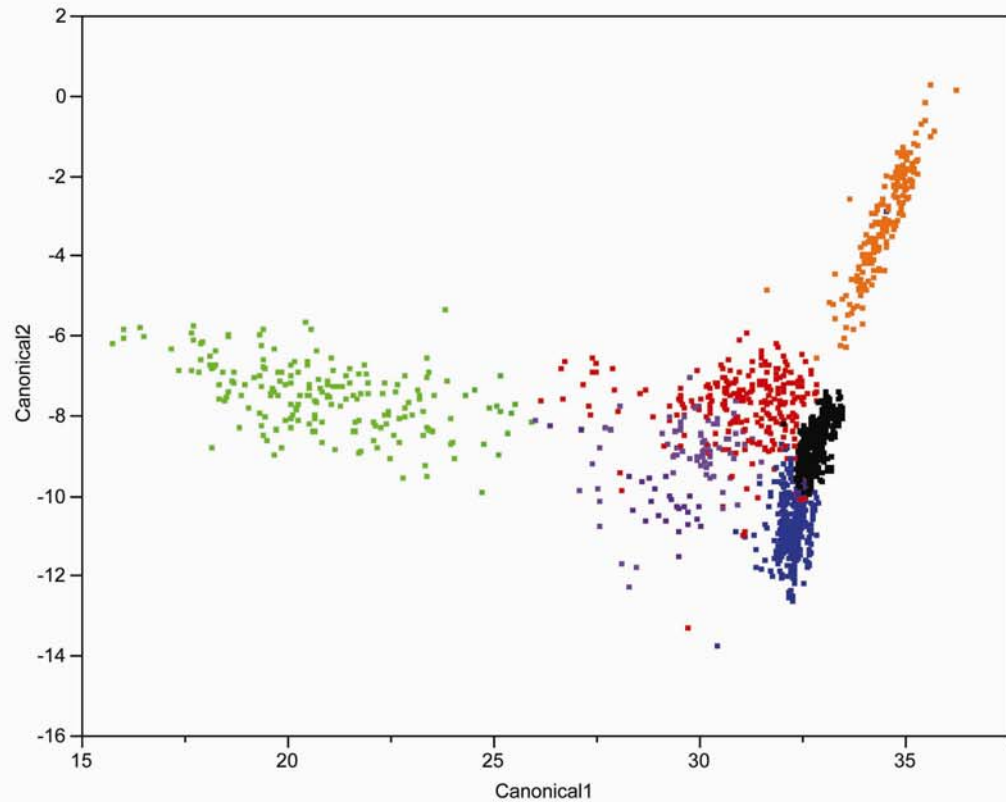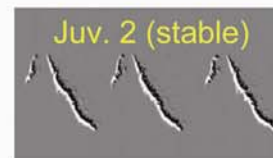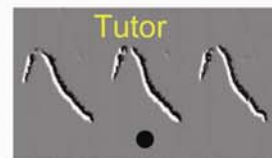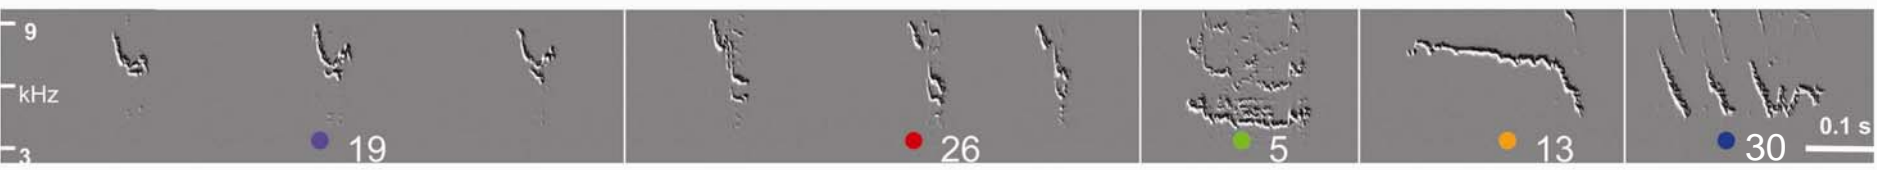

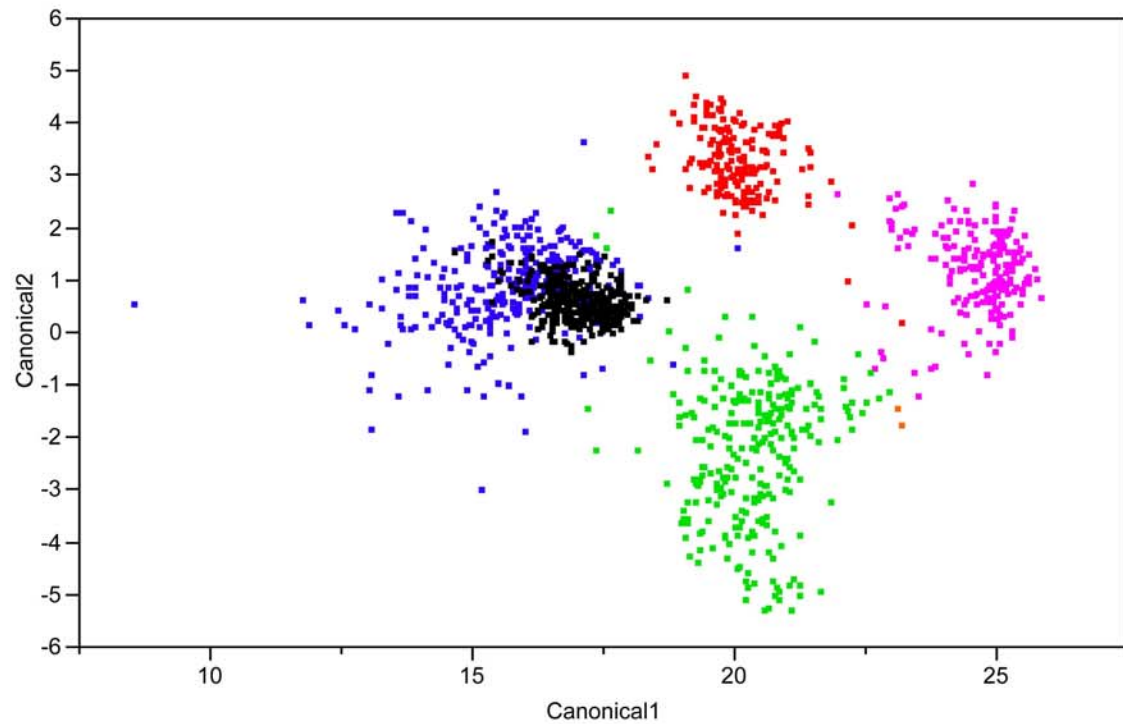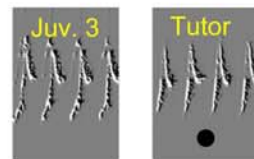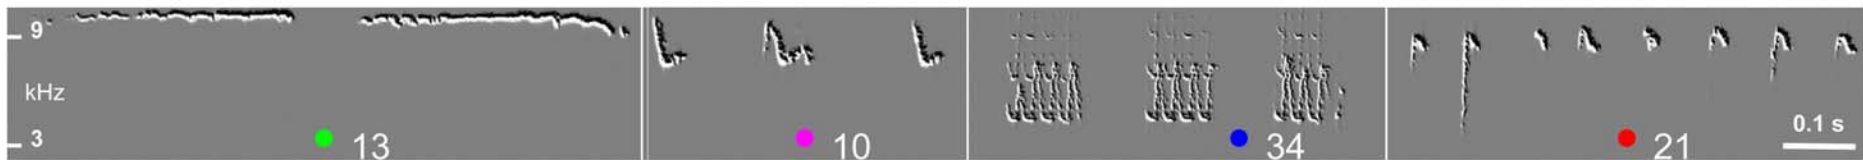

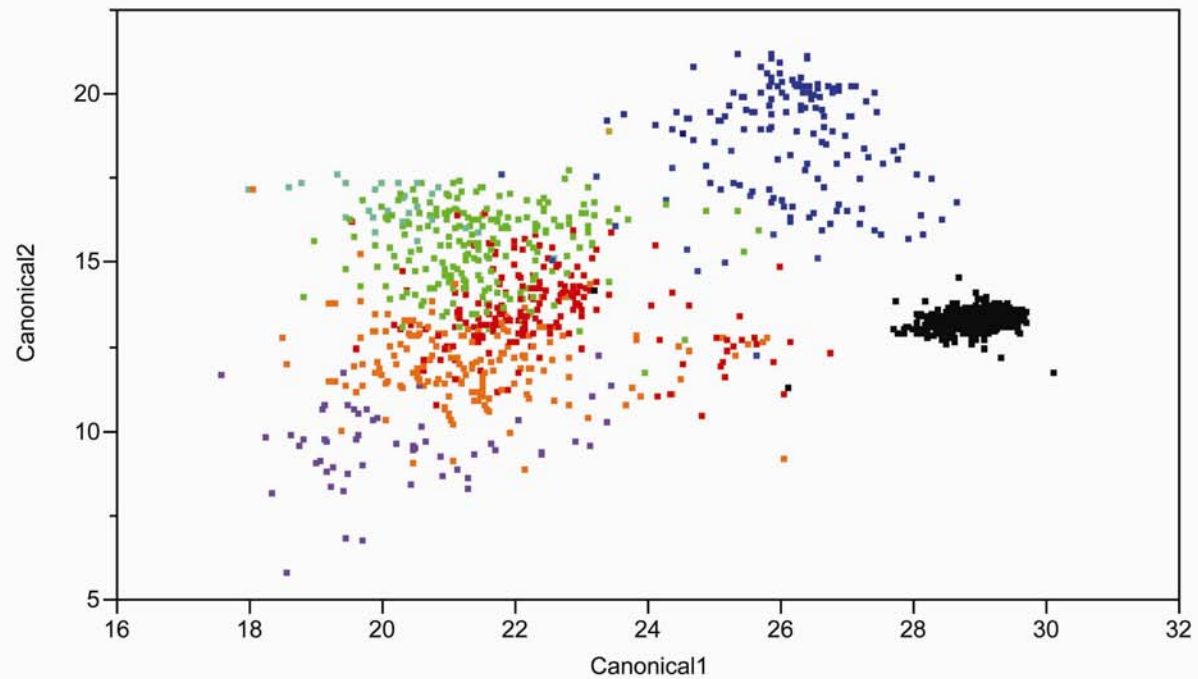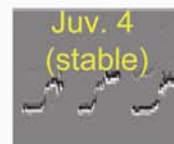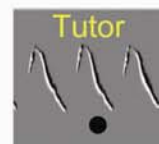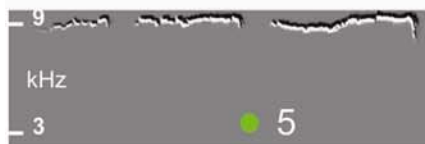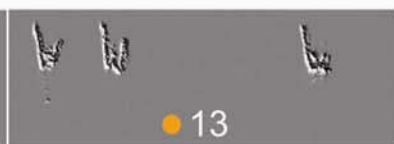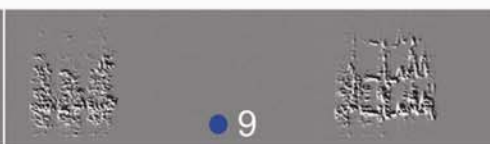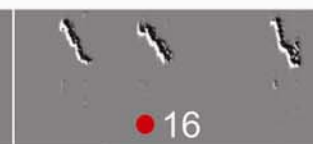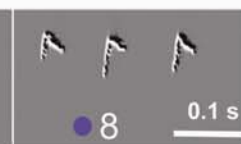

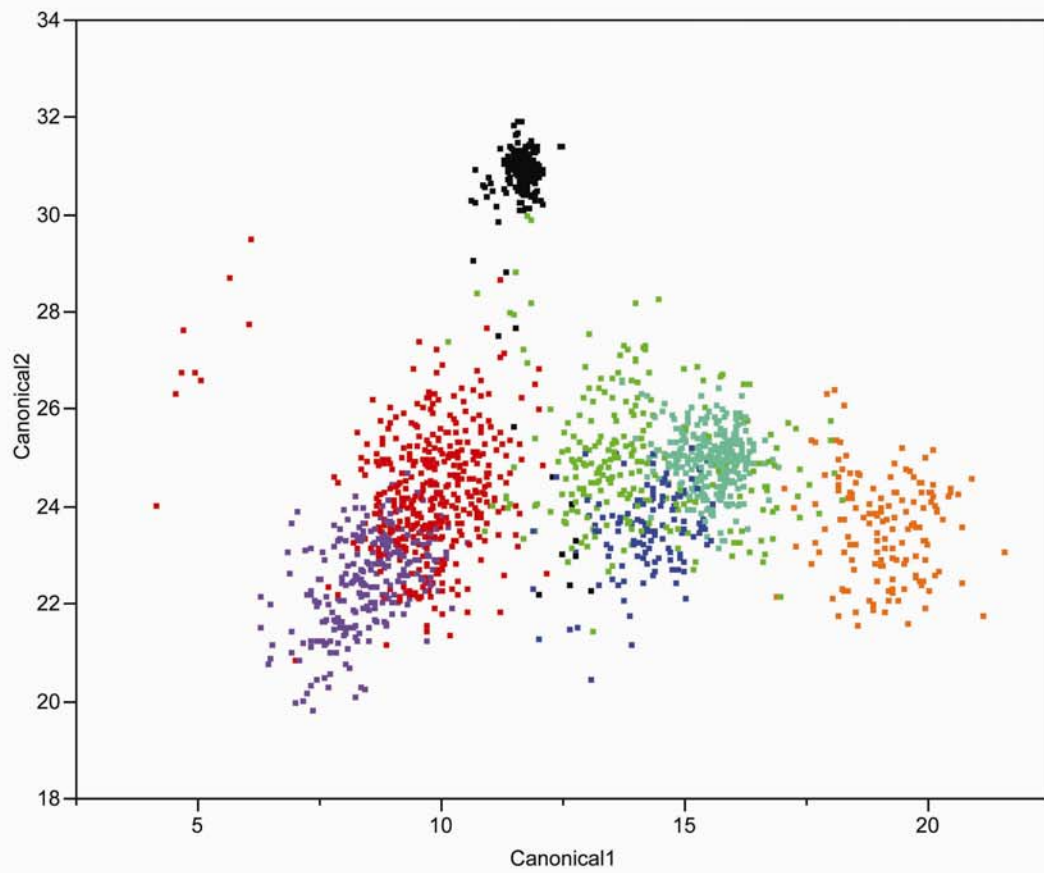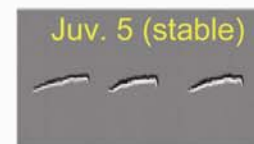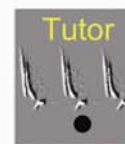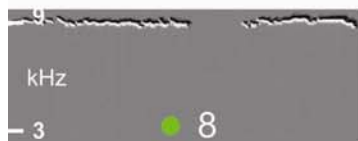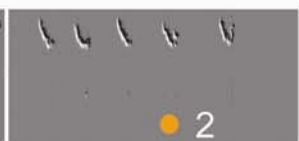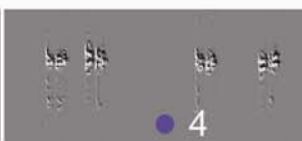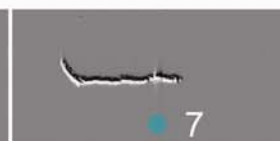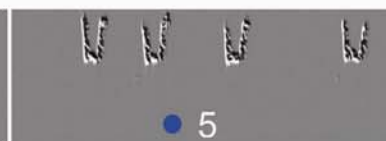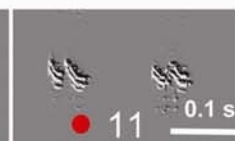

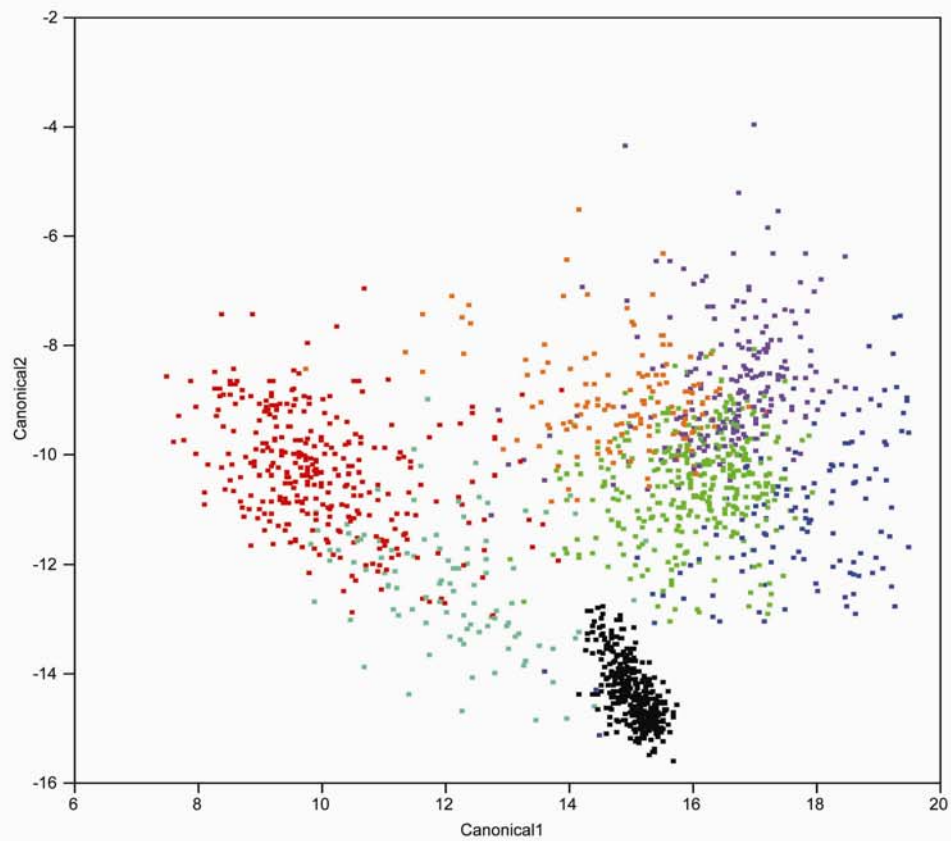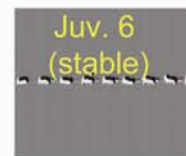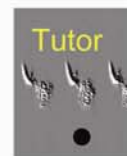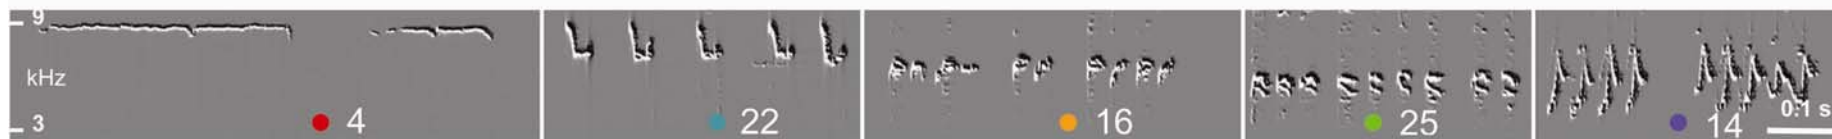

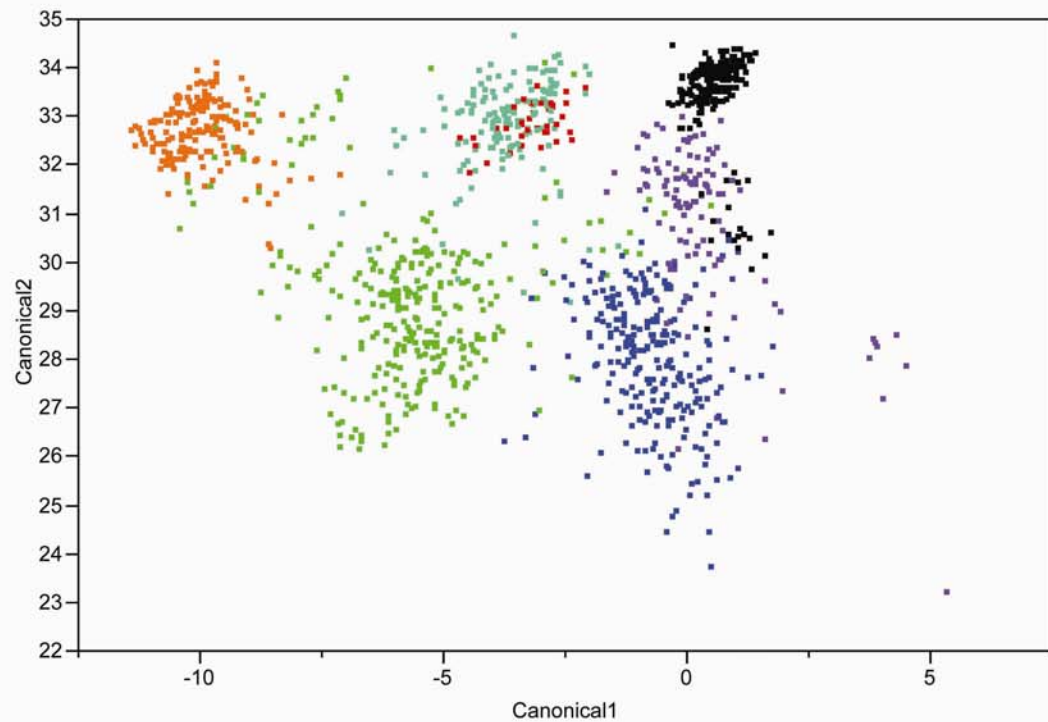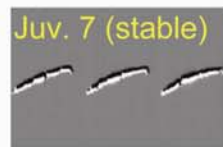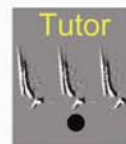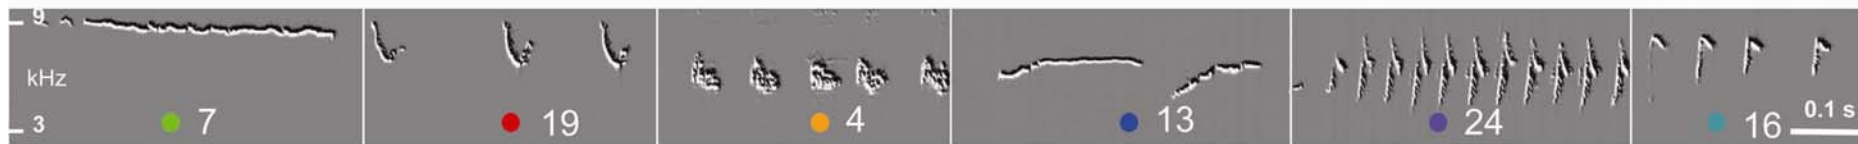

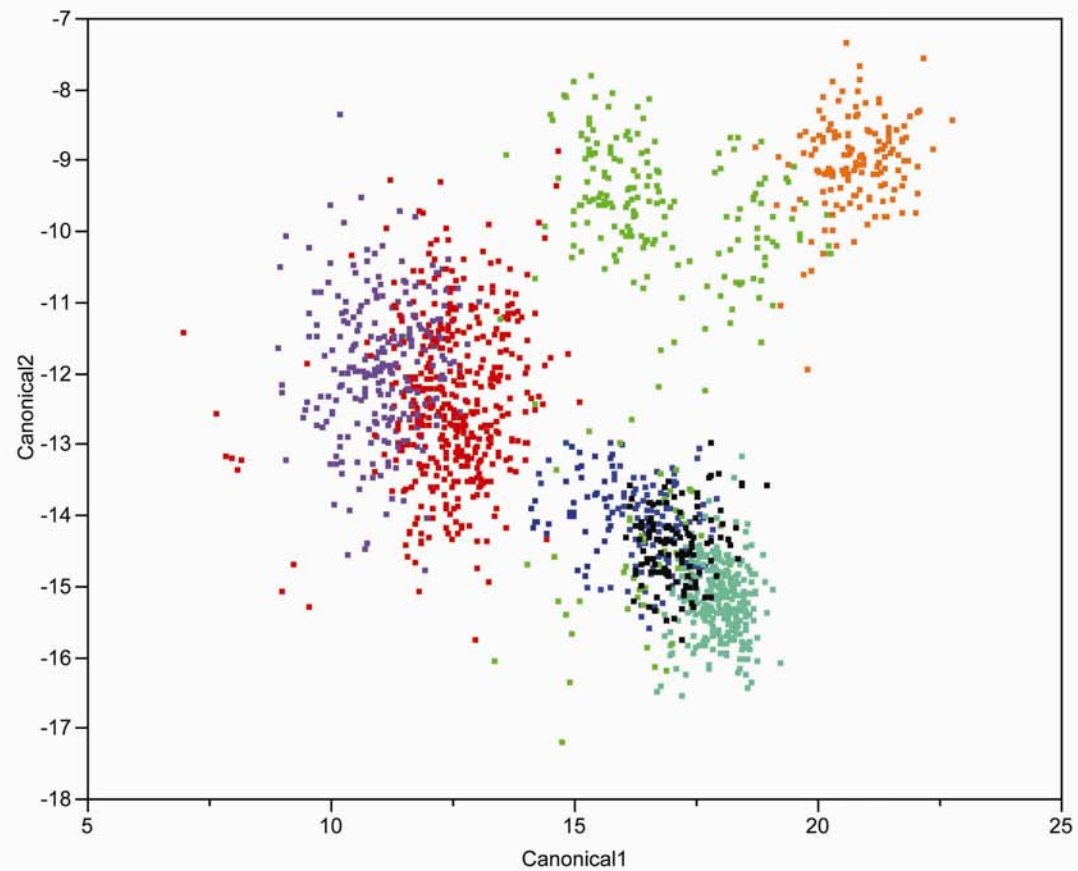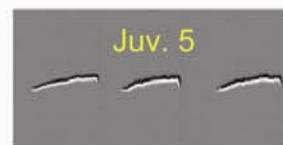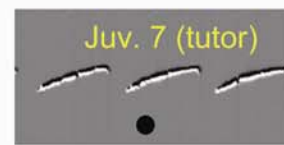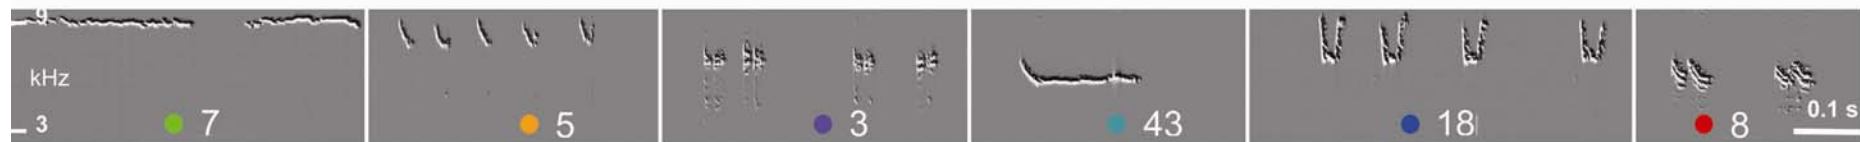

Supplement: supp_0710067104_10067Fig9.pdf [file supp_0710067104_10067Fig9.pdf]
